# Supplementary material
Source: PubMed Central journal article supplement (PMC3931418)
Supplement: NIHMS540532-supplement-Supplementary_Online_Materials.pdf [file NIHMS540532-supplement-Supplementary_Online_Materials.pdf]

**Supplementary Materials for**  
**Molecular Control of  $\delta$ -Opioid Receptor Signaling**

Gustavo Fenalti<sup>1\*</sup>, Patrick M. Giguere<sup>2\*</sup>, Vsevolod Katritch<sup>1</sup>, Xi-Ping Huang<sup>2</sup>, Aaron A.  
Thompson<sup>1</sup>, Vadim Cherezov<sup>1</sup>, Bryan L. Roth<sup>2#</sup>, Raymond C. Stevens<sup>1#</sup>

**Affiliations:**

<sup>1</sup>Department of Integrative Structural and Computational Biology, The Scripps Research Institute, 10550 North Torrey Pines Road, La Jolla, CA 92037, USA

<sup>2</sup>National Institute of Mental Health Psychoactive Drug Screening Program and Department of Pharmacology and Division of Chemical Biology and Medicinal Chemistry, University of North Carolina Chapel Hill Medical School, Chapel Hill, NC 27599, USA

\* Contributed equally

<sup>#</sup>To whom correspondence should be addressed: [bryan\\_roth@med.unc.edu](mailto:bryan_roth@med.unc.edu) or [stevens@scripps.edu](mailto:stevens@scripps.edu)

**Keywords: human opioid receptor, sodium regulation, allostery, functional selectivity, GPCR signaling, constitutive activity, arrestin**

## Supplementary Tables

**Table S1:** Data collection and refinement statistics.

| <i>Structure</i>                                    | <i>BRIL-<math>\delta</math>OR(<math>\Delta N/\Delta C</math>)-naltrindole</i> |
|-----------------------------------------------------|-------------------------------------------------------------------------------|
| <i>Data Collection</i>                              | (APS GM/CA CAT 23ID-D, 20 $\mu$ m beam)                                       |
| Number of crystals                                  | 47                                                                            |
| Space group                                         | $C2_1$                                                                        |
| Cell dimensions                                     |                                                                               |
| $a, b, c$ ( $\text{\AA}$ )                          | 86.23, 72.85, 84.41                                                           |
| $\alpha, \beta, \gamma$ ( $^\circ$ )                | 90.0, 107.4, 90.0                                                             |
| Number of reflections measured                      | 204,142                                                                       |
| Number of unique reflections                        | 45,488                                                                        |
| Resolution ( $\text{\AA}$ ) <sup>a</sup>            | 40.0-1.80 (1.86-1.80)                                                         |
| $R_{\text{merge}}$ (%)                              | 10.4 (82.2)                                                                   |
| Mean $I/\sigma I$                                   | 16.4 (2.3)                                                                    |
| Completeness                                        | 98.5 (98.5)                                                                   |
| Redundancy                                          | 4.5 (4.3)                                                                     |
| <b>Refinement</b>                                   |                                                                               |
| Resolution                                          | 29.7-1.80                                                                     |
| Number of reflection (test set)                     | 43,157 (2,303)                                                                |
| $R_{\text{work}}/R_{\text{free}}$ (%)               | 17.1/19.0                                                                     |
| <b>Number of atoms</b>                              |                                                                               |
| Protein                                             | 3,140                                                                         |
| Naltrindole                                         | 31                                                                            |
| Sodium ion                                          | 1                                                                             |
| Lipids and other                                    | 410                                                                           |
| <b>Overall B values (<math>\text{\AA}^2</math>)</b> |                                                                               |
| $\delta$ OR( $\Delta N/\Delta C$ )                  | 34.3                                                                          |
| BRIL                                                | 49.8                                                                          |
| Naltrindole                                         | 26.2                                                                          |
| Na+                                                 | 26.6                                                                          |
| Lipids and other                                    | 60.9                                                                          |
| <b>rmsd</b>                                         |                                                                               |
| Bond lengths ( $\text{\AA}$ )                       | 0.012                                                                         |
| Bond angles ( $^\circ$ )                            | 1.4                                                                           |
| <b>Ramachandran plot statistics (%)<sup>b</sup></b> |                                                                               |
| Most favoured regions                               | 99.5                                                                          |
| Additionally allowed regions                        | 0.5                                                                           |
| Disallowed regions                                  | 0                                                                             |

$R_{\text{merge}} = \sum_{\text{hkl}} |I(\text{hkl}) - \langle I(\text{hkl}) \rangle| / \sum_{\text{hkl}} I(\text{hkl})$ , where  $\langle I(\text{hkl}) \rangle$  is the mean of the symmetry equivalent reflections of  $I(\text{hkl})$ . <sup>a</sup>Highest resolution shell is shown in parentheses. <sup>b</sup>As defined in MolProbity.

**Table S2: Summary of metal binding site calculations to validate the sodium ion presence in the allosteric site of  $\delta$ -OR.** Calculations were performed using the CMM server [http://csgid.org/csgid/metal\\_sites/](http://csgid.org/csgid/metal_sites/) which uses well established concepts for ion validation<sup>1-5</sup>.

| Metal           | Occupancy* | B factor <sup>§</sup> | Valence <sup>¶2</sup> | nVECSUM <sup>#1</sup> | R.M.S.D. (°)** |
|-----------------|------------|-----------------------|-----------------------|-----------------------|----------------|
| Na <sup>+</sup> | 1          | 26.6 (26.9)           | 1.0                   | 0.082                 | 16.5           |
| Li <sup>+</sup> | 1          | 2.0 (27.2)            | 0.3                   | 0.19                  | 21.1           |
| K <sup>+</sup>  | 1          | 37.4 (26.5)           | 2.4                   | 0.071                 | 16.6           |

\*Occupancy for atom under consideration.

§ Metal ion B factor with valence-weighted; environmental average B factor in parenthesis.

¶ Summation of bond valence values for an ion binding site. Valence accounts for metal-ligand distances.

# Summation of ligand vectors weighted by bond valence values and normalized by overall valence; values increase when the coordination sphere is not symmetrical due to incompleteness.

\*\*R.M.S. deviation of observed geometry angles compared to ideal geometry (in degrees).

**Table S3: Analysis of the effects of sodium ions on the binding of  $\delta$ -OR ligands.** Displacement of [ $^3$ H] Naltrindole in the absence and presence (140 mM) of sodium chloride from WT  $\delta$ -OR expressed in HEK293 cells, and the crystallized construct BRIL- $\delta$ OR( $\Delta$ N/ $\Delta$ C)-naltrindole expressed in *Sf9* insect cells. Data were analyzed using a one-site model. Values represented as pK<sub>i</sub> average  $\pm$  SEM (K<sub>i</sub> nM) from minimum of two assays, each in triplicate.

| Ligand type and name |                        | HEK 293 WT $\delta$ -OR                         |                           | <i>Sf9</i> BRIL- $\delta$ OR( $\Delta$ N/ $\Delta$ C) |                           |
|----------------------|------------------------|-------------------------------------------------|---------------------------|-------------------------------------------------------|---------------------------|
|                      |                        | pK <sub>i</sub> $\pm$ SEM (K <sub>i</sub> , nM) |                           | pK <sub>i</sub> $\pm$ SEM (K <sub>i</sub> , nM)       |                           |
|                      |                        | 0 NaCl                                          | 140mM NaCl                | 0 NaCl                                                | 140mM NaCl                |
| Small molecule       | (-) <b>Bremazocine</b> | 7.46 $\pm$ 0.06<br>(35)                         | 7.33 $\pm$ 0.05<br>(47)   | 7.88 $\pm$ 0.11<br>(13)                               | 7.84 $\pm$ 0.12<br>(14)   |
|                      | (-) <b>Cyclazocine</b> | 7.01 $\pm$ 0.07<br>(97)                         | 6.81 $\pm$ 0.07<br>(155)  | 7.11 $\pm$ 0.07<br>(78)                               | 6.94 $\pm$ 0.07<br>(114)  |
|                      | <b>Diprenorphine</b>   | 7.88 $\pm$ 0.06<br>(13)                         | 7.63 $\pm$ 0.06<br>(24)   | 7.51 $\pm$ 0.06<br>(31)                               | 7.46 $\pm$ 0.07<br>(35)   |
|                      | <b>Etorphine</b>       | 7.06 $\pm$ 0.08<br>(88)                         | 6.21 $\pm$ 0.08<br>(613)  | 6.22 $\pm$ 0.07<br>(601)                              | 5.84 $\pm$ 0.07<br>(1569) |
|                      | <b>Naltrindole</b>     | 9.05 $\pm$ 0.07<br>(0.9)                        | 9.21 $\pm$ 0.06<br>(0.6)  | 8.94 $\pm$ 0.05<br>(1.2)                              | 9.11 $\pm$ 0.04<br>(0.8)  |
| Peptide              | <b>DADLE</b>           | 6.56 $\pm$ 0.11<br>(280)                        | 5.58 $\pm$ 0.11<br>(2600) | 5.92 $\pm$ 0.07<br>(1200)                             | 5.23 $\pm$ 0.07<br>(5900) |

**Table S4: Effects of various  $\delta$ -OR mutations on  $G\alpha_i$  and  $\beta$ -arrestin activity.**  $\delta$ -ORs WT and mutants were assayed for  $G\alpha_i$  -signaling and  $\beta$ -arrestin-recruitment as described in the Methods section. Data were subjected to non-linear least-squares regression analysis using the sigmoidal dose-response function. Data of four independent experiments (N=4) performed in quadruplicate are presented. Representative data are show in **Fig. 4**.  $\beta$ -arrestin and G protein activation are presented as % of BW373U86  $\pm$  SEM,  $EC_{50}$  (nM) and  $LogEC_{50} \pm$  SEM. “No activation” indicated that no activation was observed or the sigmoidal curve was not convergent or ambiguous.

| <b><math>\delta</math>-OR mutants</b> | <b>Ligands</b> | <b><math>\beta</math>-arrestin activation <math>E_{max}</math> (% of BW373U86 <math>\pm</math> SEM)</b> | <b><math>\beta</math>-arrestin activation <math>EC_{50}</math> (nM)</b> | <b><math>\beta</math>-arrestin activation <math>LogEC_{50} \pm</math> SEM</b> | <b><math>G\alpha_i</math> activation <math>E_{max}</math> (% of BW373U86 <math>\pm</math> SEM)</b> | <b><math>G\alpha_i</math> activation <math>EC_{50}</math> (nM)</b> | <b><math>G\alpha_i</math> activation <math>LogEC_{50} \pm</math> SEM</b> |
|---------------------------------------|----------------|---------------------------------------------------------------------------------------------------------|-------------------------------------------------------------------------|-------------------------------------------------------------------------------|----------------------------------------------------------------------------------------------------|--------------------------------------------------------------------|--------------------------------------------------------------------------|
| <b>WT</b>                             | Naltrindole    | no activation                                                                                           | no activation                                                           | no activation                                                                 | <b>53.4 <math>\pm</math> 2.8</b>                                                                   | <b>21.9</b>                                                        | <b>-7.66 <math>\pm</math> 0.10</b>                                       |
|                                       | Naltriben      | no activation                                                                                           | no activation                                                           | no activation                                                                 | <b>28.8 <math>\pm</math> 2.0</b>                                                                   | <b>19.5</b>                                                        | <b>-7.70 <math>\pm</math> 0.14</b>                                       |
|                                       | BNTX           | no activation                                                                                           | no activation                                                           | no activation                                                                 | no activation                                                                                      | no activation                                                      | no activation                                                            |
|                                       | BW373U86       | <b>99.8 <math>\pm</math> 1.7</b>                                                                        | <b>3.9</b>                                                              | <b>-8.41 <math>\pm</math> 0.04</b>                                            | <b>100.0 <math>\pm</math> 1.5</b>                                                                  | <b>3.6</b>                                                         | <b>-8.44 <math>\pm</math> 0.03</b>                                       |
|                                       | DADLE          | <b>42.4 <math>\pm</math> 0.9</b>                                                                        | <b>0.83</b>                                                             | <b>-9.08 <math>\pm</math> 0.05</b>                                            | <b>102.2 <math>\pm</math> 1.3</b>                                                                  | <b>1.3</b>                                                         | <b>-8.90 <math>\pm</math> 0.03</b>                                       |
|                                       | Deltorphin II  | <b>38.6 <math>\pm</math> 1.1</b>                                                                        | <b>2.0</b>                                                              | <b>-8.69 <math>\pm</math> 0.08</b>                                            | <b>104.9 <math>\pm</math> 3.2</b>                                                                  | <b>1.5</b>                                                         | <b>-8.82 <math>\pm</math> 0.06</b>                                       |
| <b>D95A</b>                           | Naltrindole    | <b>64.3 <math>\pm</math> 1.0</b>                                                                        | <b>4.2</b>                                                              | <b>-8.37 <math>\pm</math> 0.03</b>                                            | no activation                                                                                      | no activation                                                      | no activation                                                            |
|                                       | Naltriben      | <b>65.3 <math>\pm</math> 1.3</b>                                                                        | <b>5.6</b>                                                              | <b>-8.25 <math>\pm</math> 0.04</b>                                            | <b>24.8 <math>\pm</math> 2.5</b>                                                                   | <b>30.3</b>                                                        | <b>-7.51 <math>\pm</math> 0.10</b>                                       |
|                                       | BNTX           | <b>59.9 <math>\pm</math> 3.1</b>                                                                        | <b>66.5</b>                                                             | <b>-7.17 <math>\pm</math> 0.08</b>                                            | no activation                                                                                      | no activation                                                      | no activation                                                            |
|                                       | BW373U86       | <b>99.3 <math>\pm</math> 2.4</b>                                                                        | <b>30.7</b>                                                             | <b>-7.51 <math>\pm</math> 0.04</b>                                            | <b>98.4 <math>\pm</math> 2.7</b>                                                                   | <b>21.9</b>                                                        | <b>-7.66 <math>\pm</math> 0.04</b>                                       |
|                                       | DADLE          | <b>39.5 <math>\pm</math> 1.6</b>                                                                        | <b>58.0</b>                                                             | <b>-7.23 <math>\pm</math> 0.07</b>                                            | <b>77.0 <math>\pm</math> 3.3</b>                                                                   | <b>15.6</b>                                                        | <b>-7.80 <math>\pm</math> 0.08</b>                                       |
|                                       | Deltorphin II  | <b>43.7 <math>\pm</math> 2.8</b>                                                                        | <b>105.7</b>                                                            | <b>-6.97 <math>\pm</math> 0.09</b>                                            | <b>75.4 <math>\pm</math> 2.7</b>                                                                   | <b>1.5</b>                                                         | <b>-8.83 <math>\pm</math> 0.07</b>                                       |
| <b>N310A</b>                          | Naltrindole    | <b>45.0 <math>\pm</math> 1.0</b>                                                                        | <b>50.0</b>                                                             | <b>-7.30 <math>\pm</math> 0.03</b>                                            | no activation                                                                                      | no activation                                                      | no activation                                                            |
|                                       | Naltriben      | <b>44.6 <math>\pm</math> 1.8</b>                                                                        | <b>69.1</b>                                                             | <b>-7.16 <math>\pm</math> 0.06</b>                                            | no activation                                                                                      | no activation                                                      | no activation                                                            |
|                                       | BNTX           | <b>48.9 <math>\pm</math> 3.3</b>                                                                        | <b>646.4</b>                                                            | <b>-6.18 <math>\pm</math> 0.07</b>                                            | no activation                                                                                      | no activation                                                      | no activation                                                            |
|                                       | BW373U86       | <b>101.8 <math>\pm</math> 4.0</b>                                                                       | <b>192.7</b>                                                            | <b>-6.71 <math>\pm</math> 0.06</b>                                            | <b>100.7 <math>\pm</math> 8.7</b>                                                                  | <b>10.1</b>                                                        | <b>-7.99 <math>\pm</math> 0.18</b>                                       |
|                                       | DADLE          | no activation                                                                                           | no activation                                                           | no activation                                                                 | no activation                                                                                      | no activation                                                      | no activation                                                            |
|                                       | Deltorphin II  | no activation                                                                                           | no activation                                                           | no activation                                                                 | no activation                                                                                      | no activation                                                      | no activation                                                            |
| <b>N314A</b>                          | Naltrindole    | <b>25.5 <math>\pm</math> 1.4</b>                                                                        | <b>36.7</b>                                                             | <b>-7.43 <math>\pm</math> 0.09</b>                                            | no activation                                                                                      | no activation                                                      | no activation                                                            |
|                                       | Naltriben      | <b>27.1 <math>\pm</math> 3.0</b>                                                                        | <b>70.0</b>                                                             | <b>-7.15 <math>\pm</math> 0.19</b>                                            | no activation                                                                                      | no activation                                                      | no activation                                                            |
|                                       | BNTX           | no activation                                                                                           | no activation                                                           | no activation                                                                 | no activation                                                                                      | no activation                                                      | no activation                                                            |

|              |               |                   |               |                     |                    |               |                     |
|--------------|---------------|-------------------|---------------|---------------------|--------------------|---------------|---------------------|
|              | BW373U86      | <b>75.2 ± 5.3</b> | <b>77.2</b>   | <b>-7.11 ± 0.11</b> | <b>99.9 ± 2.7</b>  | <b>13.8</b>   | <b>-7.86 ± 0.05</b> |
|              | DADLE         | no activation     | no activation | no activation       | <b>78.6 ± 4.5</b>  | <b>52.3</b>   | <b>-7.28 ± 0.08</b> |
|              | Deltorphin II | no activation     | no activation | no activation       | <b>89.5 ± 5.7</b>  | <b>0.5</b>    | <b>-9.26 ± 0.2</b>  |
| <b>N131A</b> | Naltrindole   | no activation     | no activation | no activation       | no activation      | no activation | no activation       |
|              | Naltriben     | no activation     | no activation | no activation       | no activation      | no activation | no activation       |
|              | BNTX          | no activation     | no activation | no activation       | no activation      | no activation | no activation       |
|              | BW373U86      | no activation     | no activation | no activation       | no activation      | no activation | no activation       |
|              | DADLE         | no activation     | no activation | no activation       | no activation      | no activation | no activation       |
|              | Deltorphin II | no activation     | no activation | no activation       | no activation      | no activation | no activation       |
| <b>N131V</b> | Naltrindole   | no activation     | no activation | no activation       | no activation      | no activation | no activation       |
|              | Naltriben     | no activation     | no activation | no activation       | no activation      | no activation | no activation       |
|              | BNTX          | no activation     | no activation | no activation       | no activation      | no activation | no activation       |
|              | BW373U86      | no activation     | no activation | no activation       | <b>120.3 ± 6.2</b> | <b>27.9</b>   | <b>-7.55 ± 0.11</b> |
|              | DADLE         | no activation     | no activation | no activation       | <b>100.0 ± 4.9</b> | <b>4.4</b>    | <b>-8.35 ± 0.10</b> |
|              | Deltorphin II | no activation     | no activation | no activation       | <b>35.8 ± 3.4</b>  | <b>3.1</b>    | <b>-8.51 ± 0.16</b> |

**Table S5. Effects of various mutations on  $\delta$ -OR radioligand binding parameters.** For these experiments  $^3\text{H}$ -naltrindole saturation and DADLE competition assays using  $^3\text{H}$ -Naltrindole in the absence of sodium chloride were performed. Results are presented as average  $\pm$  SEM from two or more separate experiments, each in triplicate. Binding curves were fit to a one-site model. The same data were also fit to a two-site model and the results are shown in **Table S6**. NA=no activity; these receptor mutants expressed receptor which did not bind  $^3\text{H}$ -naltrindole.

| $\delta$ -OR | $^3\text{H}$ -naltrindole $K_d$ (nM) | DADLE binding affinity against $^3\text{H}$ -naltrindole |                           |                                 |
|--------------|--------------------------------------|----------------------------------------------------------|---------------------------|---------------------------------|
|              |                                      | [ $^3\text{H}$ -naltrindole] nM in assays                | $pK_i \pm \text{SEM}$ (n) | Average $K_i$ ( $\mu\text{M}$ ) |
| Wild-type    | 0.52                                 | 1.25 – 1.60                                              | $6.47 \pm 0.09$ (4)       | 0.34                            |
| D95A         | 0.68                                 | 1.25 – 1.60                                              | $5.51 \pm 0.04$ (5)       | 3.09                            |
| D95N         | 0.96                                 | 1.25 – 1.60                                              | $5.45 \pm 0.05$ (5)       | 3.52                            |
| D128A        | NA                                   | NA                                                       | NA                        | NA                              |
| N131A        | 1.17                                 | 1.25 – 1.60                                              | $7.12 \pm 0.06$ (5)       | 0.08                            |
| N131V        | 1.17                                 | 1.25 – 1.60                                              | $6.83 \pm 0.06$ (5)       | 0.15                            |
| S135A        | NA                                   | NA                                                       | NA                        | NA                              |
| N310A        | NA                                   | NA                                                       | NA                        | NA                              |
| N314A        | NA                                   | NA                                                       | NA                        | NA                              |

**Table S6. DADLE binding against <sup>3</sup>H-Naltrindole in the absence of sodium chloride fit to a two-site model.** Results are presented as average ± SEM from three or four assays. High affinity fraction values were taken directly from curve-fitting. High and low IC<sub>50</sub> values and their corresponding 95% Confidence Intervals (C.I.) were taken from curve-fitting and converted to corresponding high and low affinity (pK<sub>i</sub>) and 95% C.I. values using the Cheng-Prusoff equation. Note that Asp95Ala reduced high DADLE binding affinity, but did not significantly reduce the high affinity fraction. Asp95Asn reduced the high affinity fraction, but did not reduce DADLE high affinity. Asn131Ala or Asn131Val increased DADLE high affinity. DADLE low affinity remained unchanged in all mutants.

| <b>δ-OR</b>      | <b>High affinity fraction</b> | <b>High pK<sub>i</sub> (95% C.I.)</b> | <b>Low pK<sub>i</sub> (95% C.I.)</b> |
|------------------|-------------------------------|---------------------------------------|--------------------------------------|
| <b>Wild-type</b> | 0.70 ± 0.05                   | 6.90 (7.06 – 6.73)                    | 5.10 (5.48 – 4.72)                   |
| <b>D95A</b>      | 0.49 ± 0.19                   | 6.07 (6.55 – 5.59)*                   | 4.95 (5.42 – 4.49)                   |
| <b>D95N</b>      | 0.17 ± 0.05**                 | 6.72 (7.32 – 6.11)                    | 5.14 (5.26 – 5.04)                   |
| <b>N131A</b>     | 0.69 ± 0.12                   | 7.46 (7.59 – 7.34)*                   | 4.57 (4.85 – 4.29)                   |
| <b>N131V</b>     | 0.75 ± 0.03                   | 7.24 (7.35 – 7.13)*                   | 4.81 (5.15 – 4.47)                   |

\* P < 0.0001 and \*\* p < 0.05 as compared with WT δ-OR.



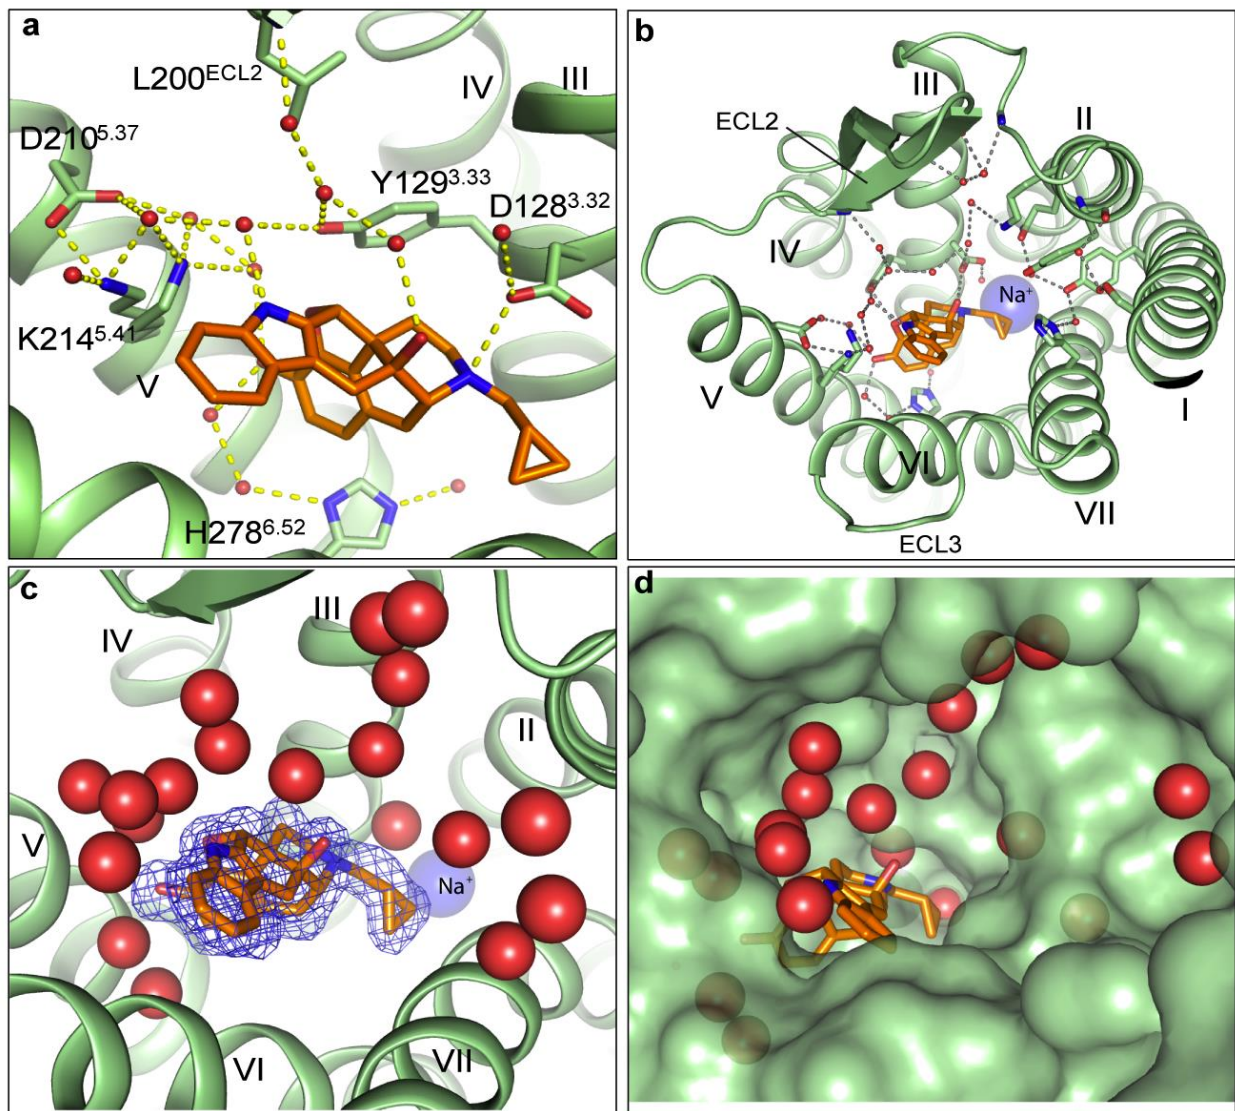

**Fig. S1. Interactions in the orthosteric ligand binding site of BRIL- $\delta$ OR( $\Delta$ N/ $\Delta$ C)-naltrindole.** (a) ‘Close up’ view of the hydrogen bond interaction network (yellow dotted lines) between the ligand naltrindole (orange sticks) and receptor (green cartoon; side chains shown as sticks) showing water (red spheres) mediated interactions. (b) Overview of water mediated interactions (grey dotted lines) in the orthosteric pocket of BRIL- $\delta$ OR( $\Delta$ N/ $\Delta$ C)-naltrindole. (c)  $mF_o - DF_c$  ‘omit’ electron density map (blue mesh) around naltrindole (orange sticks) after simulated annealing in PHENIX<sup>6</sup> (5000K; contoured at  $3\sigma$ ); all water molecules surrounding the ligand in the orthosteric site are shown (red spheres). (d) Surface representation of the BRIL- $\delta$ OR( $\Delta$ N/ $\Delta$ C)-naltrindole (green surface) showing the position of naltrindole (orange sticks) and the water cluster (red spheres) in the orthosteric site.

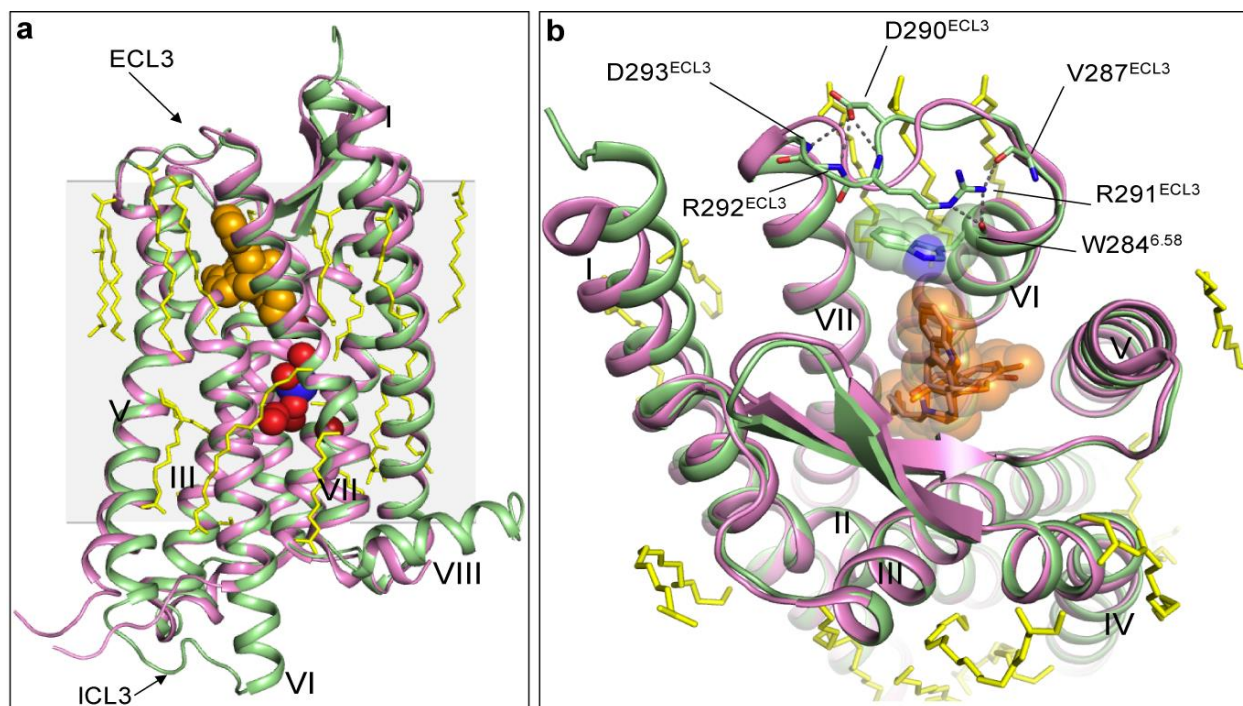

**Fig. S2. Superposition of *Mus musculus* and human  $\delta$ -OR receptor structures.** (a) Comparison of the human BRIL- $\delta$ OR( $\Delta$ N/ $\Delta$ C)-naltrindole structure (green) with the previously determined 3.4 Å crystal structure of the *Mus musculus*  $\delta$ OR-T4L (magenta; PDB ID 4EJ4). The ligand naltrindole in the BRIL- $\delta$ OR( $\Delta$ N/ $\Delta$ C)-naltrindole structure is shown as orange spheres and is omitted in the 4EJ4 structure. Water molecules and the sodium ion in the allosteric site of BRIL- $\delta$ OR( $\Delta$ N/ $\Delta$ C)-naltrindole structure are shown as red and blue spheres respectively. The grey box represents the approximate regions of the receptor 7TM domain embedded in the lipidic bilayer; yellow sticks represent lipids. ICL3 fusion protein in 4EJ4 (T4L) and N-terminal BRIL fusion protein in BRIL- $\delta$ OR( $\Delta$ N/ $\Delta$ C)-naltrindole structures are omitted. (b) ECL3 conformation of human  $\delta$ -OR and comparison with mouse  $\delta$ OR-T4L ECL3 structure. BRIL- $\delta$ OR( $\Delta$ N/ $\Delta$ C)-naltrindole is shown as green cartoon and side chains are depicted as green sticks. The ligand naltrindole is represented by orange carbon sticks and transparent spheres (BRIL- $\delta$ OR( $\Delta$ N/ $\Delta$ C)-naltrindole structure) and magenta carbon sticks (4EJ4 structure).



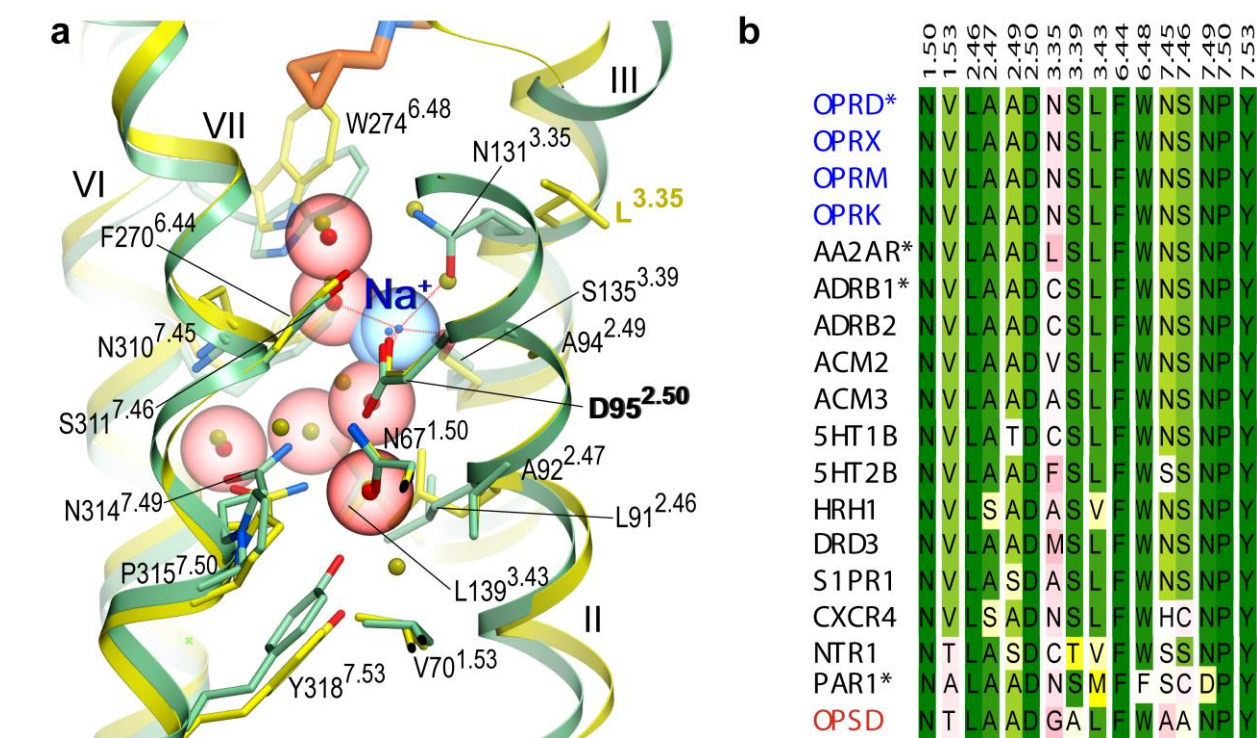

**Fig. S3. Conservation of the allosteric pocket in class A GPCRs harboring a sodium ion and a water cluster.** (a) Structural comparison of the sodium pocket between BRIL- $\delta$ OR( $\Delta$ N/ $\Delta$ C)-naltrindole structure (green cartoon and carbon atoms) and sodium-bound 1.8 Å resolution structure of adenosine  $A_{2A}$  receptor<sup>6</sup> ( $A_{2A}$ AR; PDB ID 4E1Y; yellow cartoon and carbons). Water molecules of the pocket in  $\delta$ -OR structure are shown by red transparent spheres and smaller solid spheres, while water molecules in  $A_{2A}$ AR structure pocket are shown with small yellow solid spheres only. Sodium ions in both structures are shown with blue transparent spheres, with red dotted lines from  $Na^+$  to the five coordinating oxygen atoms shown in the  $\delta$ -OR structure. Part of the ligand naltrindole is shown as thick sticks with orange carbons. The comparison reveals identical side chains and similar conformations in 15 residue positions of the pocket (numbered as in  $\delta$ -OR, with superscripts showing Ballesteros-Weinstein positions of the residues<sup>7</sup>). The important exception is 3.35 position that in  $\delta$ -OR features a polar Asn131<sup>3.35</sup> side chain coordinating the  $Na^+$  ion, while in  $A_{2A}$ AR the Leu87<sup>3.35</sup> side chain is oriented towards the lipidic membrane. (b) Sequence comparison of the allosteric sodium pocket residues in currently available crystal structures of class A GPCRs. Asterisk marks receptors with high-resolution crystallographic evidence for sodium ions coordinated by the D<sup>2.50</sup> side chain. Note that Rhodopsin (OPSD) lacks polar residues in key positions 3.39, 7.45 and 7.46, which sets it apart from other class A receptors.

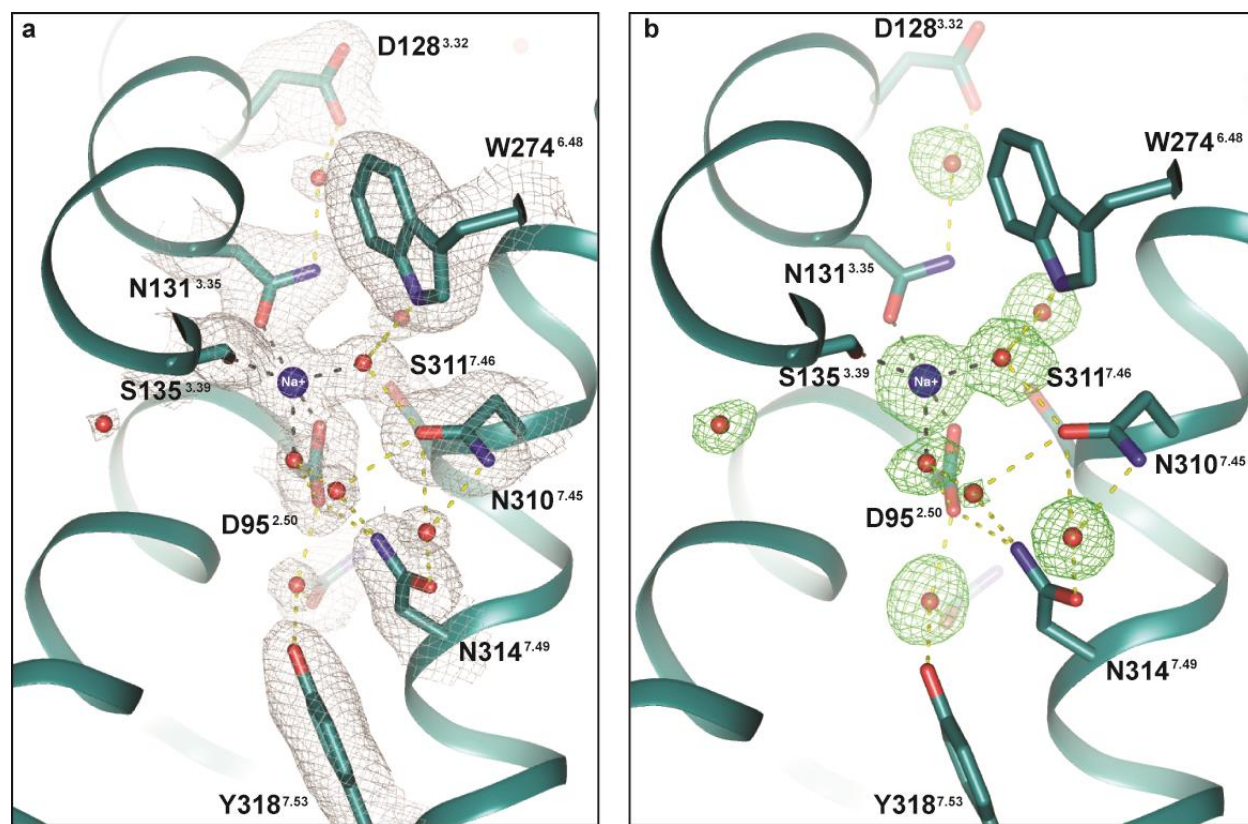

**Fig. S4. Electron density maps around the  $\delta$ -OR sodium binding site.** (a)  $2mF_o - DF_c$  electron density map (grey mesh) of receptor residues (cyan sticks) around the sodium ion (blue sphere) binding site contoured at  $1\sigma$ . Black dashed lines represent interactions between the sodium ion and the atoms in direct contact with the receptor residues or water molecules in the first hydration shell of the ion. Yellow dashed lines shows the hydrogen bond network of water molecules and receptor residues. These polar interactions in the core of the 7TM bundle of the receptor establish an axis of connectivity between the orthosteric binding site, allosteric sodium site and residues in the intracellular side of the receptor. (b)  $mF_o - DF_c$  “omit” electron density map of sodium ion and coordinating water molecules after simulated annealing in PHENIX<sup>8</sup> (5000K; contoured at  $3\sigma$ ).

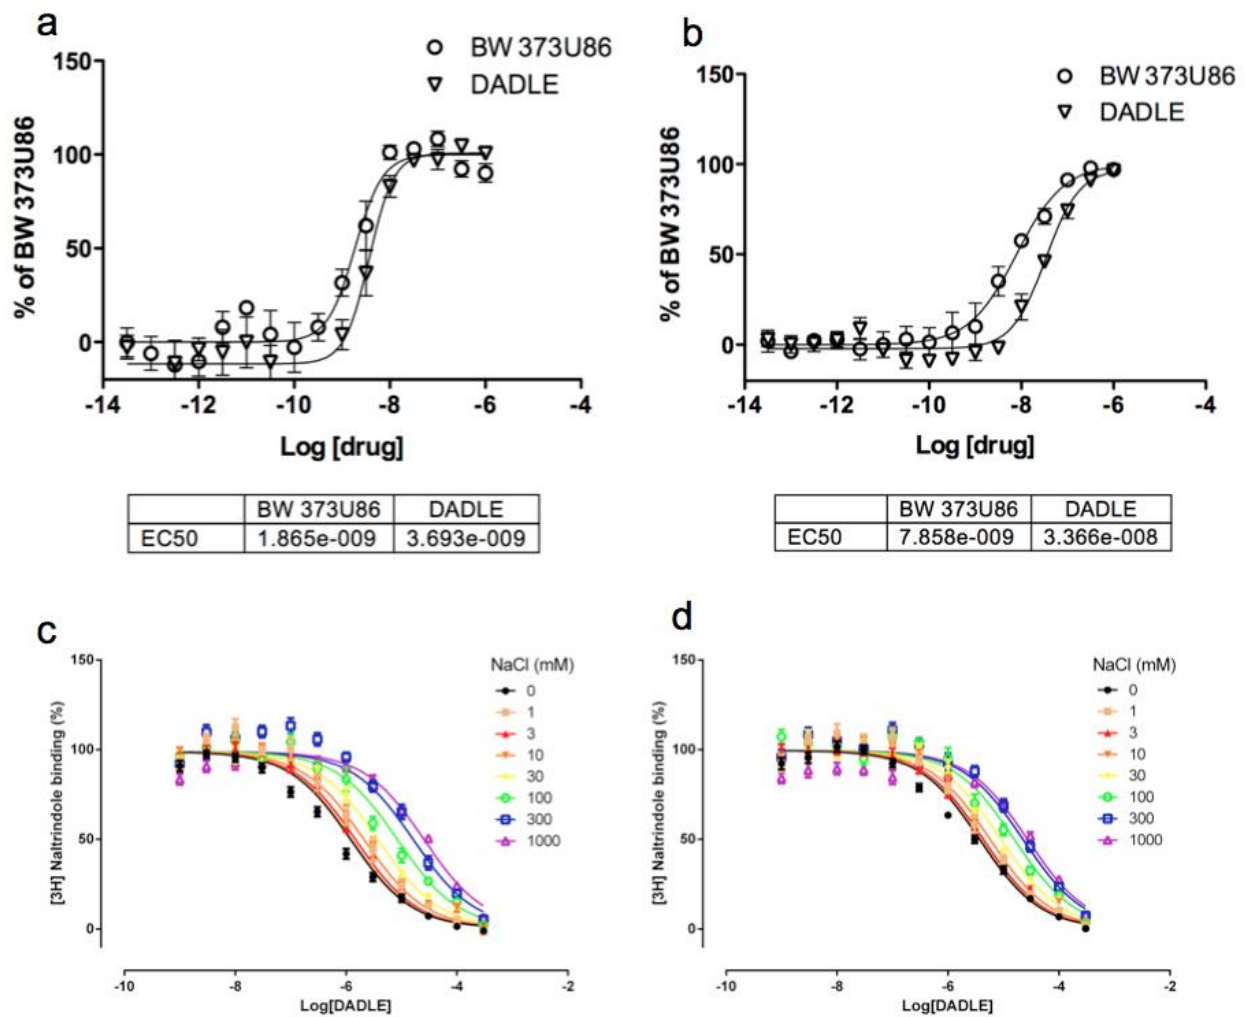

**Fig. S5. Functional characterization of WT  $\delta$ -OR and the engineered BRIL- $\delta$ OR( $\Delta$ N/ $\Delta$ C) construct used for crystallization.** G-protein signaling characterization for (a) WT and (b) BRIL- $\delta$ OR( $\Delta$ N/ $\Delta$ C) is shown. Allosteric inhibitory effect of sodium on DADLE binding to  $^3$ H-naltrindole labeled (c) WT  $\delta$ -OR expressed in HEK293 cells (positive control) and (d) the BRIL- $\delta$ OR( $\Delta$ N/ $\Delta$ C) construct used for crystallization and expressed in *Sf9* cells. Ligand binding data in (d) were analyzed using the allosteric model, and the results are shown in **Table 1**. Data represent the mean of four independent experiments each in quadruplicate.

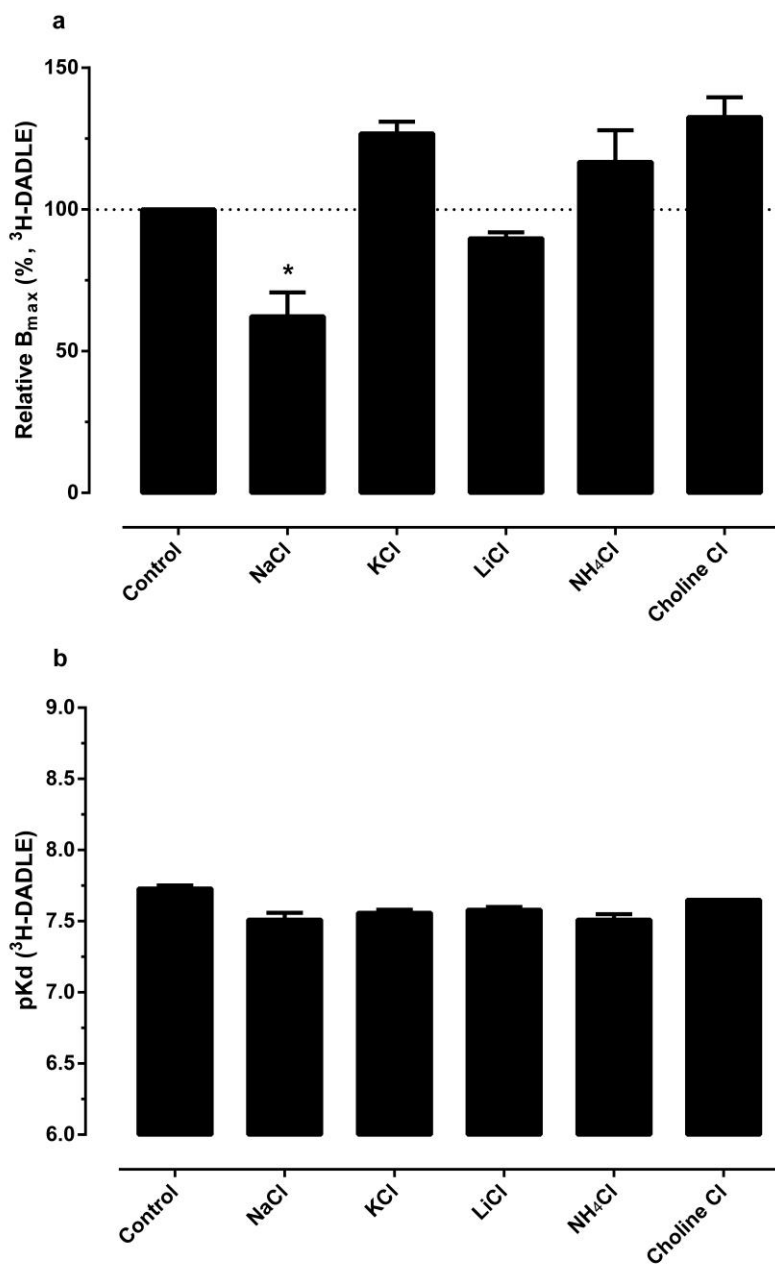

**Fig. S6. Effects of different monovalent cations on the binding of DADLE to BRIL- $\delta$ OR( $\Delta$ N/ $\Delta$ C).** The effects of different cations on both the total number of binding sites (relative  $B_{max}$  in Panel a) and affinity ( $pK_d$  in Panel b) of  $^3$ H-DADLE at the crystallized  $\delta$ -OR construct expressed in *Sf9* cells.  $^3$ H-DADLE saturation binding assays were conducted with control binding buffer (50 mM Tris HCl, pH 7.40) in the absence (control) and presence of 100 mM of the indicated chloride salts. Results were analyzed in Prism to obtain  $B_{max}$  and  $K_d$  values. The  $B_{max}$  values were then normalized to control (100%) in each assay. Values represent mean  $\pm$  SEM from 3 independent assays, each in triplicate. Note: \* $p < 0.05$  by one-way ANOVA.

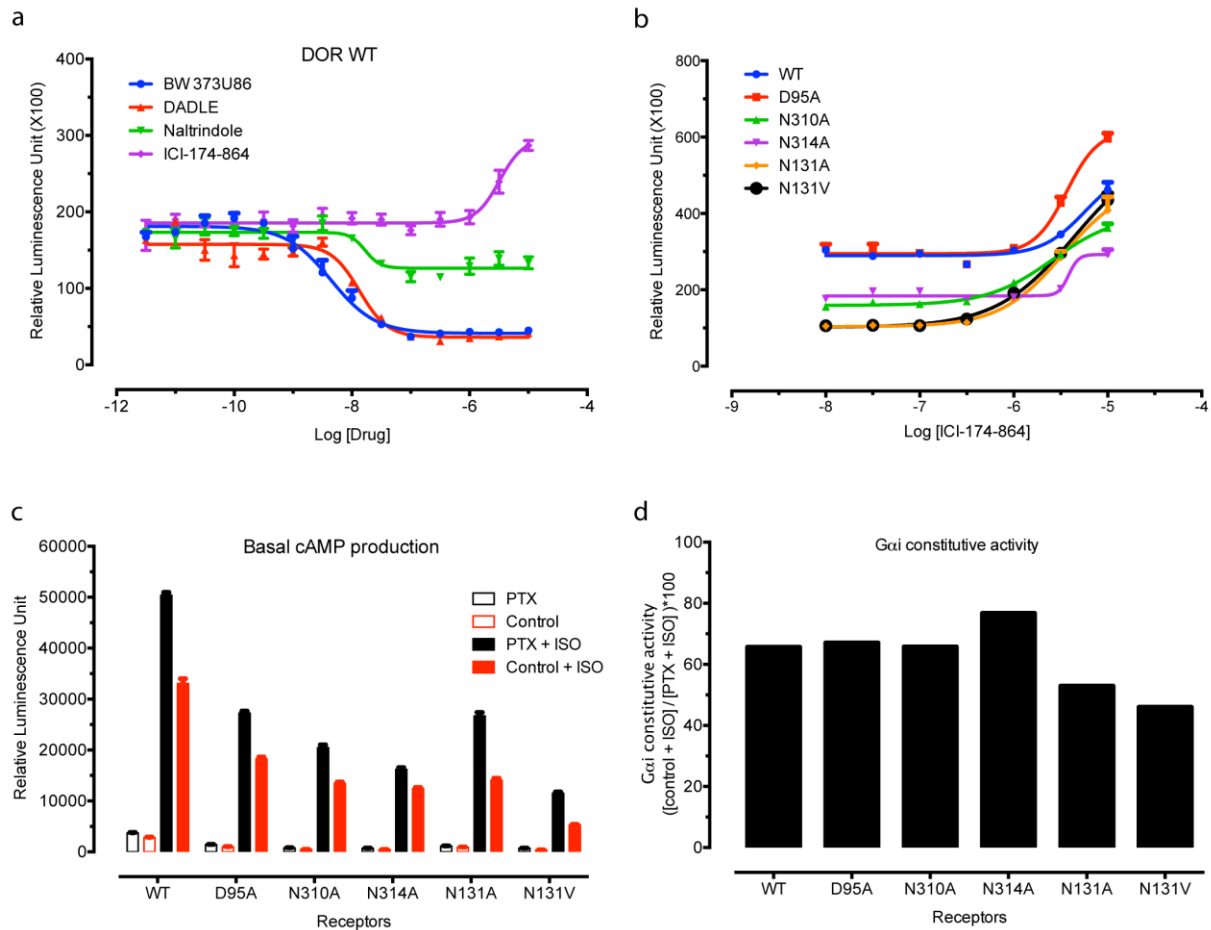

**Fig. S7. Effect of sodium site mutations on basal  $G\alpha_i$  activity.** HEK293 cells were transfected with 10  $\mu$ g of receptor DNA and 10  $\mu$ g of Glosensor per 15-cm dish and WT and mutant  $\delta$ -ORs were assayed for  $G\alpha_i$ -signaling as described in the Methods section. **(a)** Concentration-responses of WT  $\delta$ -OR-mediated  $G\alpha_i$  signaling induced by the agonists BW 373U86 and DADLE, the antagonist\* Naltrindole, and the inverse agonist ICI-174-864. **(b)** Concentration-responses of  $\delta$ -OR WT and mutants-mediated  $G\alpha_i$  signaling induced by the inverse agonist ICI-174-864. **(c-d)** Cells were treated with 100 ng/ml PTX for 12 hours, depleting all  $G\alpha_i$  constitutive activity. **(c)** Non-normalized basal cAMP level of the  $\delta$ -OR WT and mutants in the presence or absence of the pertussis toxin (PTX) and isoproterenol (ISO). **(d)** Net  $G\alpha_i$  -constitutive activity was calculated using formula: cAMP level (RLU) from control + ISO / cAMP level (RLU) from PTX + ISO \* 100. The data in **(a)** and **(b)** represent the mean  $\pm$  S.E.M. of at least four different experiments each in quadruplicate. The data in **(c)** and **(d)** represent the mean  $\pm$  S.E.M of 32 wells (N=32).

\* Weak partial agonist activity of Naltrindole at  $G\alpha_i$  signaling was previously described<sup>9,10</sup>.

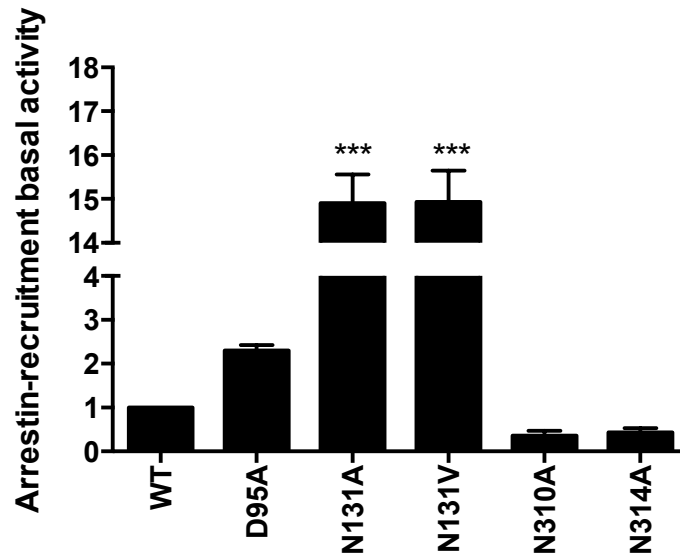

**Fig. S8. Effect of sodium site mutations on basal  $\beta$ -arrestin signaling.** WT and mutant  $\delta$ -ORs were assayed for  $\beta$ -arrestin-recruitment as described in the Methods section. HTLA cells were transfected with 15  $\mu$ g of receptor DNA per 15-cm dish and basal activity measured 48 h later. Data are presented relative to WT receptor using the means  $\pm$  S.E.M. of at least four different experiments each in quadruplicate; \* $p$ <0.05, \*\* $p$ <0.01 and \*\*\* $p$ <0.001 by one-way ANOVA.



## References

- 1 Muller, P., Kopke, S. & Sheldrick, G. M. Is the bond-valence method able to identify metal atoms in protein structures? *Acta Crystallogr. D* **59**, 32-37 (2003).
- 2 Brown, I. D. Recent developments in the methods and applications of the bond valence model. *Chem Rev* **109**, 6858-6919, doi:10.1021/cr900053k (2009).
- 3 Zheng, H., Chruszcz, M., Lasota, P., Lebioda, L. & Minor, W. Data mining of metal ion environments present in protein structures. *J Inorg Biochem* **102**, 1765-1776, doi:10.1016/j.jinorgbio.2008.05.006 (2008).
- 4 Nayal, M. & Di Cera, E. Valence screening of water in protein crystals reveals potential Na<sup>+</sup> binding sites. *J Mol Biol* **256**, 228-234 (1996).
- 5 Kuppuraj, G., Dudev, M. & Lim, C. Factors governing metal-ligand distances and coordination geometries of metal complexes. *J Phys Chem B* **113**, 2952-2960, doi:10.1021/jp807972e (2009).
- 6 Liu, W. *et al.* Structural basis for allosteric regulation of GPCRs by sodium ions. *Science* **337**, 232-236, doi:10.1126/science.1219218 (2012).
- 7 Ballesteros, J. A., Weinstein H. Vol. 25 Ch. Methods Neuroscience, 366-428 (1995).
- 8 Adams, P. D. *et al.* PHENIX: a comprehensive Python-based system for macromolecular structure solution. *Acta Crystallogr D* **66**, 213-221, doi:10.1107/S0907444909052925 (2010).
- 9 Szekeres, P. G. & Traynor, J. R. Delta opioid modulation of the binding of guanosine-5'-O-(3-[<sup>35</sup>S]thio)triphosphate to NG108-15 cell membranes: characterization of agonist and inverse agonist effects. *J Pharmacol Exp Therap* **283**, 1276-1284 (1997).
- 10 Liu, J. G. & Prather, P. L. Chronic agonist treatment converts antagonists into inverse agonists at delta-opioid receptors. *J Pharmacol Exp Therap* **302**, 1070-1079, doi:10.1124/jpet.102.035964 (2002).
